# Supplementary material
Source: PubMed Central journal article supplement (PMC11324168)
Supplement: JGMED23008911.pdf [file JGMED23008911.pdf]

## Supplementary Data

### Interview Guide

1. What is your current understanding of the effect of abortion restrictions on emergency medicine practice?
2. Do you anticipate changing abortion laws will have any effect on your future practice? Explain further.
3. Do you feel like residency training should include more information about how abortion restrictions will affect practice?
4. Would changing abortion laws affect where you consider to work in the future/did it affect where you looked for jobs after residency?
5. If there was content in residency training in this space, what areas would you like to see covered?
6. Say you are practicing in a state like California where abortion is legal. You care for a patient that presents with vaginal bleeding after a self-managed abortion. The patient is from Texas. Would you change your care at all?
7. You are practicing in a state where abortion is banned. The only exceptions are for a “risk of death or a serious risk of substantial impairment of a major bodily function unless the abortion is performed.” A patient presents with ectopic pregnancy. She is hemodynamically stable. How would you proceed?
8. One of the questions I’m trying to understand is how national events like these changes laws affect development of professional identity. Have these changes affected how you view your role as a doctor?
